# Supplementary material for: Transcriptomic and Proteomic Analysis of Drought Stress Response in Opium Poppy Plants during the First Week of Germination
Source: Plants (Basel). 2021 Sep 10;10(9):1878. doi: 10.3390/plants10091878 (PMC8465278; doi:10.3390/plants10091878)
Supplement: Supplementary file 1 [file plants-10-01878-s001.zip]

Archive with 4 entries (4 files):
- Supplementary material 1_Germination experiment and plant material.xlsx
- Supplementary material 2_Venn diagrams of DEGs and DEPs intersection.xlsx
- Supplementary material 3_Stem and root length of opium poppy varieties.xlsx
- Supplementary material 4_Detailed protocol of proteomics.pdf
