# Supplementary material for: Transcriptomic and Proteomic Analysis of Drought Stress Response in Opium Poppy Plants during the First Week of Germination
Source: Plants (Basel). 2021 Sep 10;10(9):1878. doi: 10.3390/plants10091878 (PMC8465278; doi:10.3390/plants10091878)
Supplement: Supplementary file 1 [file plants-10-01878-s001.zip › Supplementary material 1_Germination experiment and plant material.xlsx]

## Sheet: Germination experiment
Supplementary material 1: Germination experiment of opium poppy varieties Extaz and Prevalskij 133, and plant material used for RNA and protein isolations (next list)
	The number of the germinated seeds after 48 hours cultivation at wet filtration paper in Petri dish*
			2017	2018	2019	Average	Standard error
	15O0800157	Extaz	48	49	34	43.6667	6.84755	Faster germinating, drought resistant variety
	15O0800108	Prevalskij 133	17	1	1	6.33333	7.54247	Slower germinating, drought sensitive variety
	*50 correctly developed seeds were regularly placed on the wet filtration paper. Closed dishes were cultivated at standard temperature 20°C, 16 h light and 8 h night. The emergence start (developed root) was assessed after 48 h.
	Genotype description
	15O0800108	The plants middle early, middle height, the simple flower white without basal spot. The greater capsules are globular to kidney form with wax layer, closed. White seeds, the seed oil content middle to lower, the morphine content in the poppy straw lower.
	15O0800157	The plants middle to late ripening, middle height. The simple flower white having light violet basal spot. Middle capsules cordate having wax layer, closed. Blue to grey seeds with the middle oil content. Mean content of morphine in poppy straw.
	15O0800108			15O0800108				15O0800108							15O0800108
	15O0800157			15O0800157				15O0800157							15O0800157

## Sheet: Plant material for isolations
Plant material used for RNA and protein isolations
