# Supplementary material for: Transcriptomic and Proteomic Analysis of Drought Stress Response in Opium Poppy Plants during the First Week of Germination
Source: Plants (Basel). 2021 Sep 10;10(9):1878. doi: 10.3390/plants10091878 (PMC8465278; doi:10.3390/plants10091878)
Supplement: Supplementary file 1 [file plants-10-01878-s001.zip › Supplementary material 2_Venn diagrams of DEGs and DEPs intersection.xlsx]

## Sheet: List1
Supplementary material 2: Venn diagrams of DEGs and DEPs intersection in particular contrasts of interest
	Prevalskij variety, control vs. drought condition (DEGs and DEPs intersection)									Extaz variety, control vs. drought condition (DEGs and DEPs intersection)
										no intersection
	Extaz vs. Prevalskij, control condition (DEGs and DEPs intersection)									Extaz vs. Prevalskij, drought condition (DEGs and DEPs intersection)
