# Supplementary material for: Transcriptomic and Proteomic Analysis of Drought Stress Response in Opium Poppy Plants during the First Week of Germination
Source: Plants (Basel). 2021 Sep 10;10(9):1878. doi: 10.3390/plants10091878 (PMC8465278; doi:10.3390/plants10091878)
Supplement: Supplementary file 1 [file plants-10-01878-s001.zip › Supplementary material 3_Stem and root length of opium poppy varieties.xlsx]

## Sheet: Stem
Supplementary material 3: Lenghts of stem and roots (next list) of opium poppy varieties used in this study for RNA and protein isolations (sampled 7 days after sowing plants)
Stem	157 K1 [cm]	157 K2 [cm]	157 K3 [cm]	157 S1 [cm]	157 S2 [cm]	108 K1 [cm]	108 K2 [cm]	108 K3 [cm]	108 S1 [cm]	108 S2 [cm]	108 S3 [cm]
1st measurement	2.4	3.5	2.8	2.7	2.7	2	2.5	2.5	3.2	2	2.5
2nd measurement	2.5	3	2.5	3.3	2	2.1	1.8	2.9	2.9	2.5	3
3rd measurement	2.7	3.1	3	3.2	3	1.8	1.7	1.7	2.6	2.2	-
Average	2.5	3.2	2.8	3.07	2.57	1.97	2	2.37	2.9	2.23	2.75
Standard deviation	0.152753	0.264575	0.251661	0.321455	0.51316	0.152753	0.43589	0.61101	0.3	0.251661	0.353553
108 - Prevalskij
157 - Extaz
K - control treatments
S - stressed treatments
The Missing number is caused by the absence of plants.

## Sheet: Root
Root	157 K1 [cm]	157 K2 [cm]	157 K3 [cm]	157 S1 [cm]	157 S2 [cm]	108 K1 [cm]	108 K2 [cm]	108 K3 [cm]	108 S1 [cm]	108 S2 [cm]	108 S3 [cm]
1st measurement	4.1	7.2	3.7	4.5	-	2.6	1.8	-	3.3	-	-
2nd measurement	5.5	2.6	6.2	4.1	4	4.1	-	-	4.1	-	2.5
3rd measurement	5	3.5	3.1	-	3.5	4.5	-	5.8	-	-	-
Average	4.9	4.4	4.3	4.3	3.8	3.7	1.8	5.8	3.7	-	2.5
Standard deviation	0.70946	2.4379	1.64418	0.282843	0.353553	1.00167	-	-	0.565685	-	-
108 - Prevalskij
157 - Extaz
K - control treatments
S - stressed treatments
The missing numbers are caused by root damage during taking samples from the soil.
